# Supplementary material for: Phylogeographic characterization of the ribbon worm Lineus sanguineus populations from the Southwestern Atlantic (Heteronemertea: Lineidae): a true case of cosmopolitanism
Source: Research Square preprint supplement (doi:10.21203/rs.3.rs-3471918/v1), 2023-11-30
Supplement: Supplementary file 1 [file 304b744ad8efa23cf73f2859.pdf]

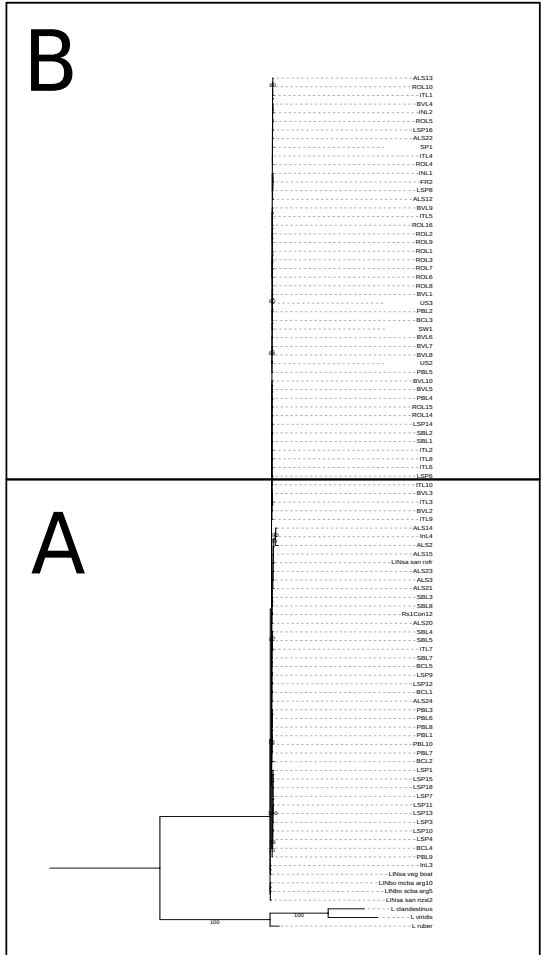

A

90  
70

87

92

100

79  
70

100

100

LSP6  
ITL10  
BVL3  
ITL3  
BVL2  
ITL9  
ALS14  
INL4  
ALS2  
ALS15  
France\_3  
ALS23  
ALS3  
ALS21  
SBL3  
SBL8  
France\_1  
ALS20  
SBL4  
SBL5  
ITL7  
SBL7  
BCL5  
LSP9  
LSP12  
BCL1  
ALS24  
PBL3  
PBL6  
PBL8  
PBL1  
PBL10  
PBL7  
BCL2  
LSP1  
LSP15  
LSP18  
LSP7  
LSP11  
LSP13  
LSP3  
LSP10  
LSP4  
BCL4  
PBL9  
INL3  
United\_States\_1  
Argentina\_1  
Argentina\_2  
New\_Zeland\_1  
*L. clandestinus*  
*L. viridis*  
*L. ruber*

B<sup>80</sup>

82

84

ALS13  
ROL10  
ITL1  
BVL4  
INL2  
ROL5  
LSP16  
ALS22  
Spain\_1  
ITL4  
ROL4  
INL1  
France\_2  
LSP8  
ALS12  
BVL9  
ITL5  
ROL16  
ROL2  
ROL9  
ROL1  
ROL3  
ROL7  
ROL6  
ROL8  
BVL1  
United\_States\_3  
PBL2  
BCL3  
Sweden\_1  
BVL6  
BVL7  
BVL8  
United\_States\_2  
PBL5  
BVL10  
BVL5  
PBL4  
ROL15  
ROL14  
LSP14  
SBL2  
SBL1  
ITL2  
ITL8  
ITL6  
LSP6
