# Supplementary material for: Phylogeographic characterization of the ribbon worm Lineus sanguineus populations from the Southwestern Atlantic (Heteronemertea: Lineidae): a true case of cosmopolitanism
Source: Research Square preprint supplement (doi:10.21203/rs.3.rs-3471918/v1), 2023-11-30
Supplement: Supplementary file 5 [file eee701c0303dc11cfede4983.pdf]

16SrRNA mPTP  
 COI mPTP  
 16SrRNA ABGD  
 COI ABGD

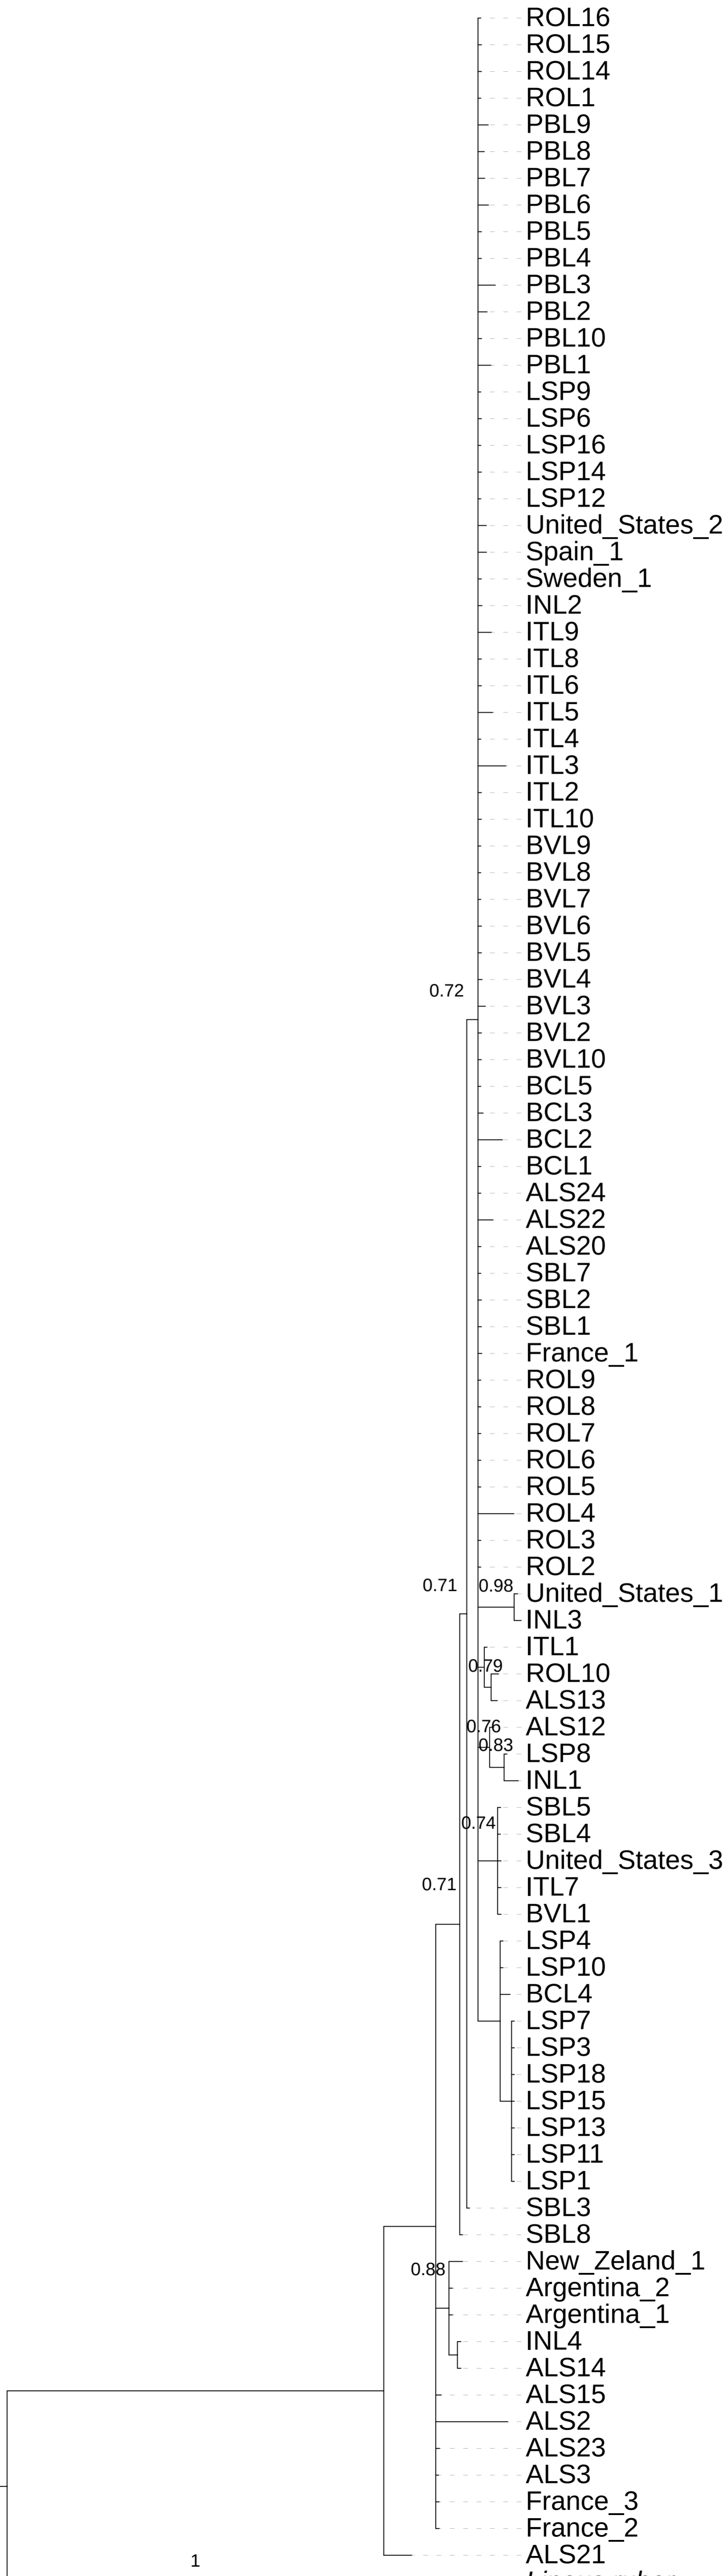

1

ROL16  
 ROL15  
 ROL14  
 ROL1  
 PBL9  
 PBL8  
 PBL7  
 PBL6  
 PBL5  
 PBL4  
 PBL3  
 PBL2  
 PBL10  
 PBL1  
 LSP9  
 LSP6  
 LSP16  
 LSP14  
 LSP12  
 United\_States\_2  
 Spain\_1  
 Sweden\_1  
 INL2  
 ITL9  
 ITL8  
 ITL6  
 ITL5  
 ITL4  
 ITL3  
 ITL2  
 ITL10  
 BVL9  
 BVL8  
 BVL7  
 BVL6  
 BVL5  
 BVL4  
 BVL3  
 BVL2  
 BVL10  
 BCL5  
 BCL3  
 BCL2  
 BCL1  
 ALS24  
 ALS22  
 ALS20  
 SBL7  
 SBL2  
 SBL1  
 France\_1  
 ROL9  
 ROL8  
 ROL7  
 ROL6  
 ROL5  
 ROL4  
 ROL3  
 ROL2  
 United\_States\_1  
 INL3  
 ITL1  
 ROL10  
 ALS13  
 ALS12  
 LSP8  
 INL1  
 SBL5  
 SBL4  
 United\_States\_3  
 ITL7  
 BVL1  
 LSP4  
 LSP10  
 BCL4  
 LSP7  
 LSP3  
 LSP18  
 LSP15  
 LSP13  
 LSP11  
 LSP1  
 SBL3  
 SBL8  
 New\_Zeland\_1  
 Argentina\_2  
 Argentina\_1  
 INL4  
 ALS14  
 ALS15  
 ALS2  
 ALS23  
 ALS3  
 France\_3  
 France\_2  
 ALS21  
 Lineus ruber
