# Supplementary figures and images for: Phylogeographic characterization of the ribbon worm Lineus sanguineus populations from the Southwestern Atlantic (Heteronemertea: Lineidae): a true case of cosmopolitanism
Source: Research Square preprint supplement (doi:10.21203/rs.3.rs-3471918/v1), 2023-11-30

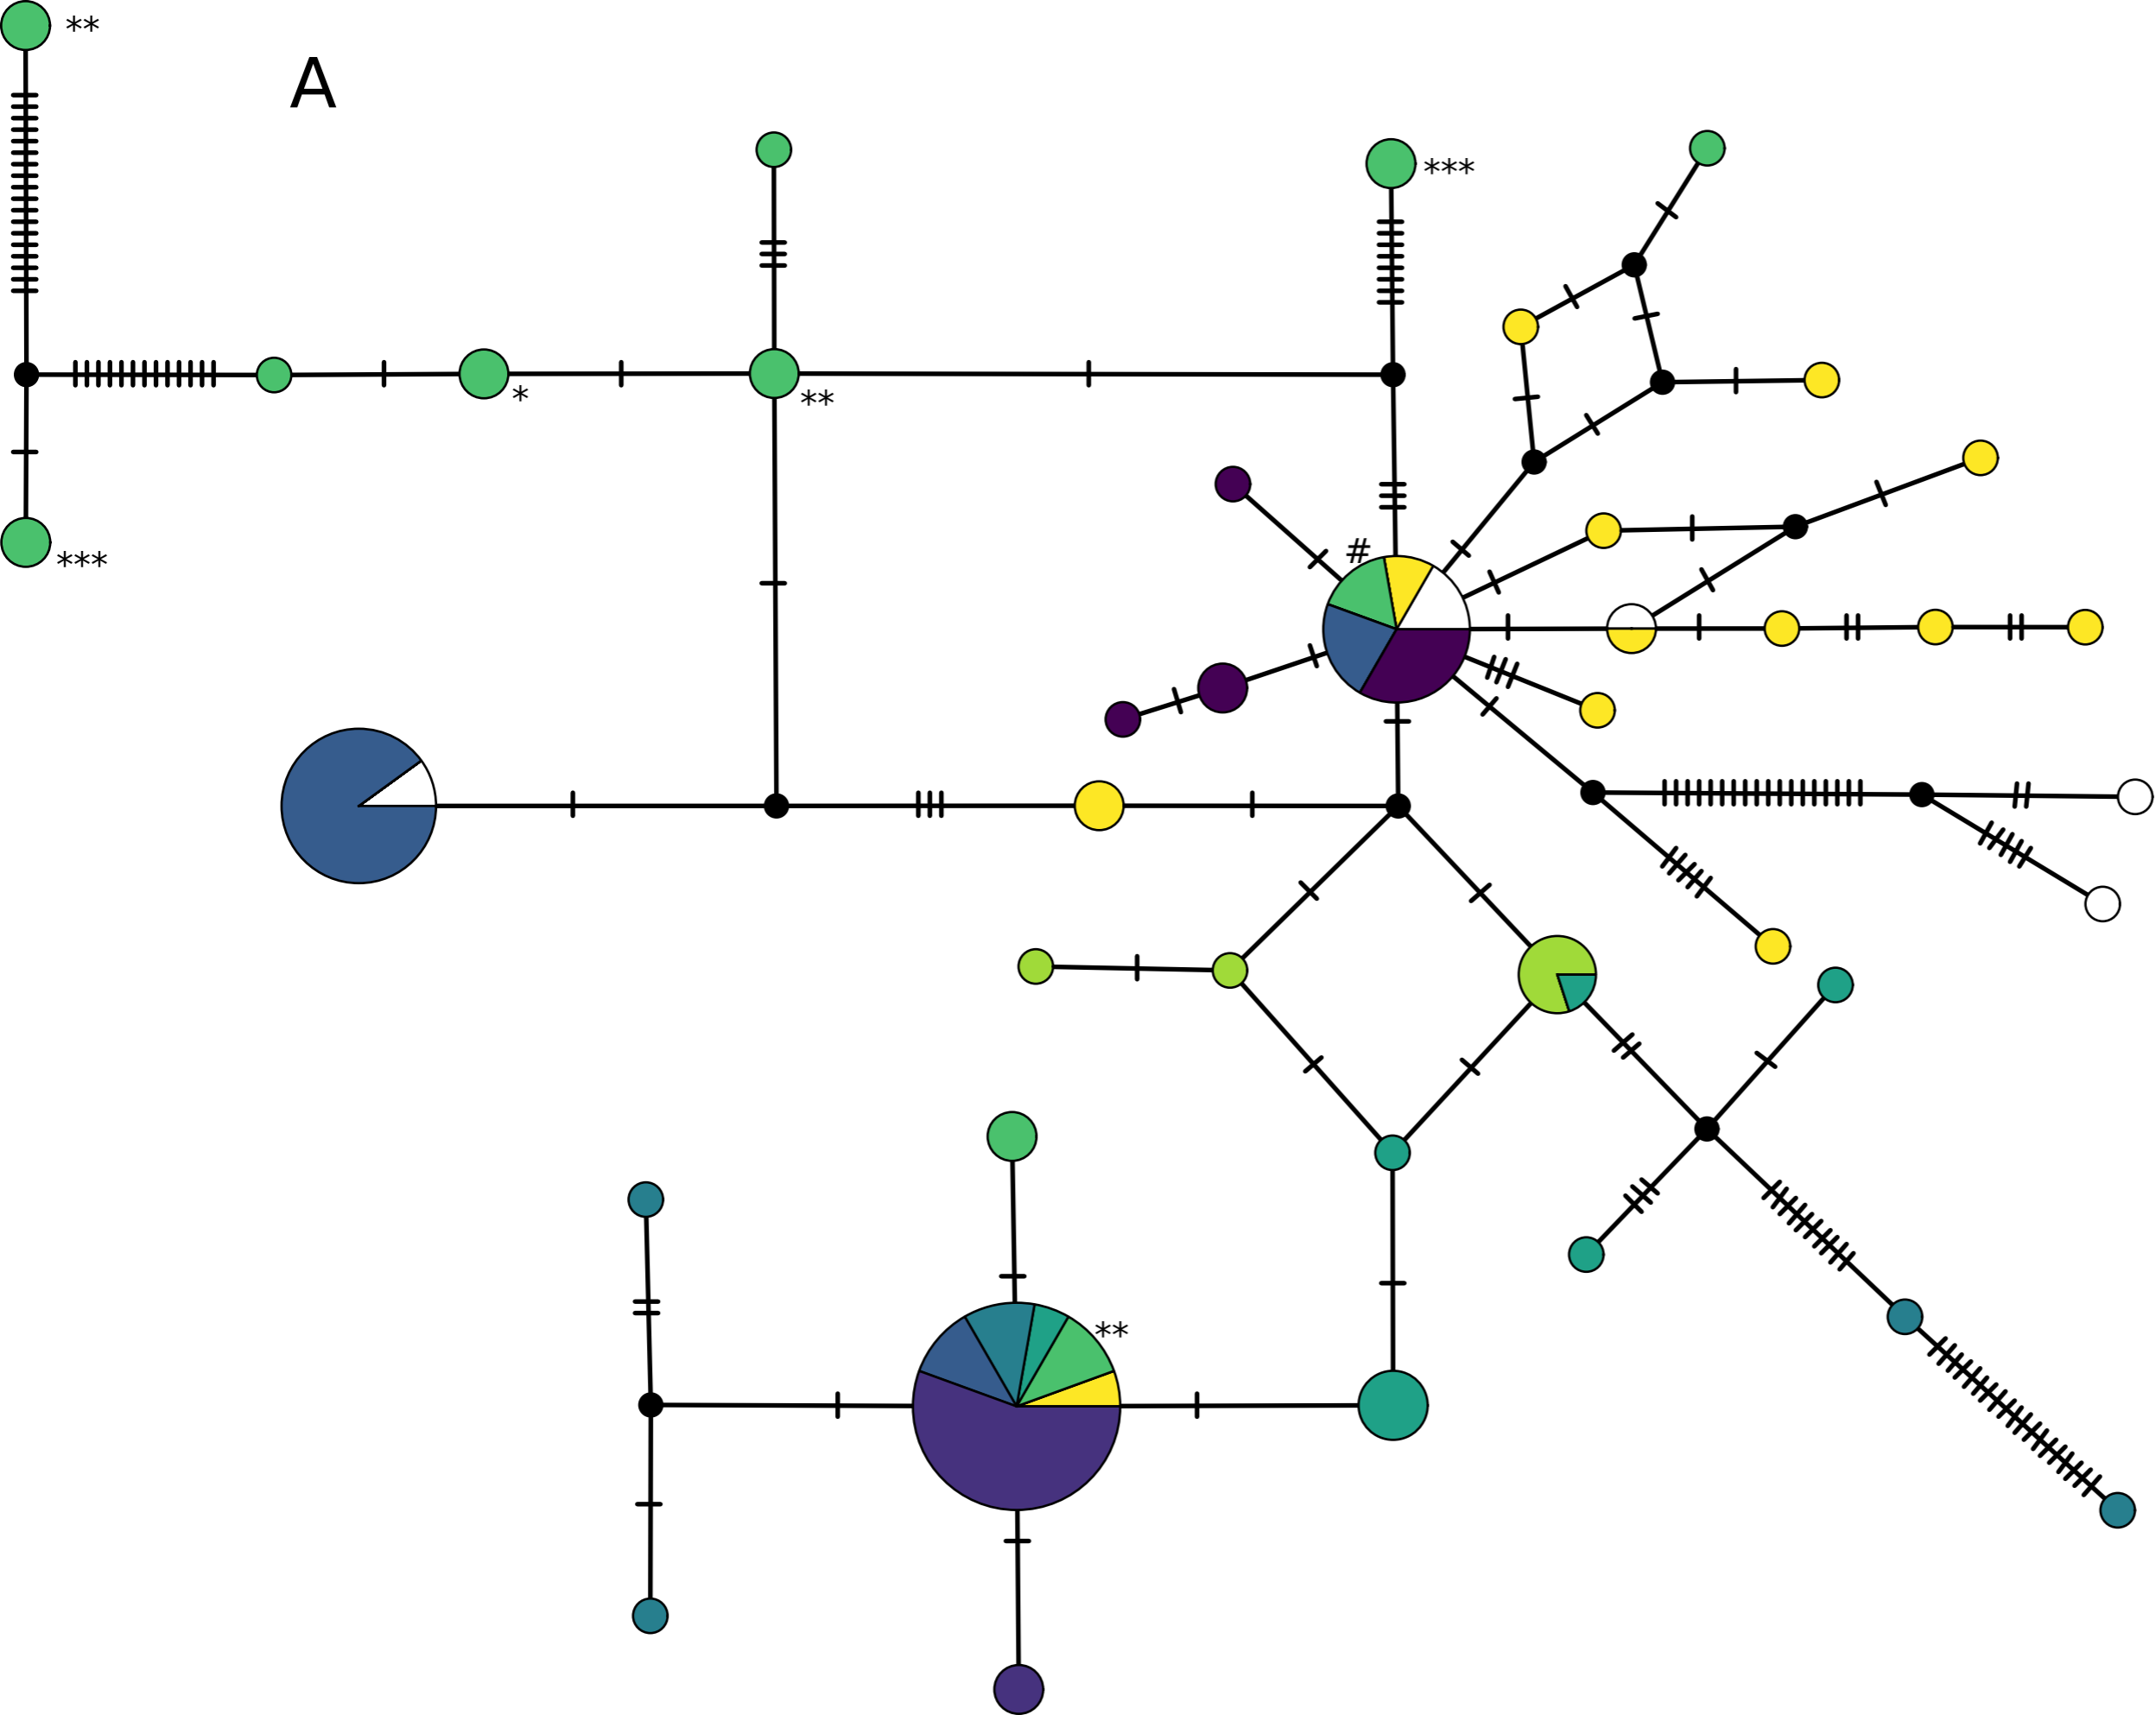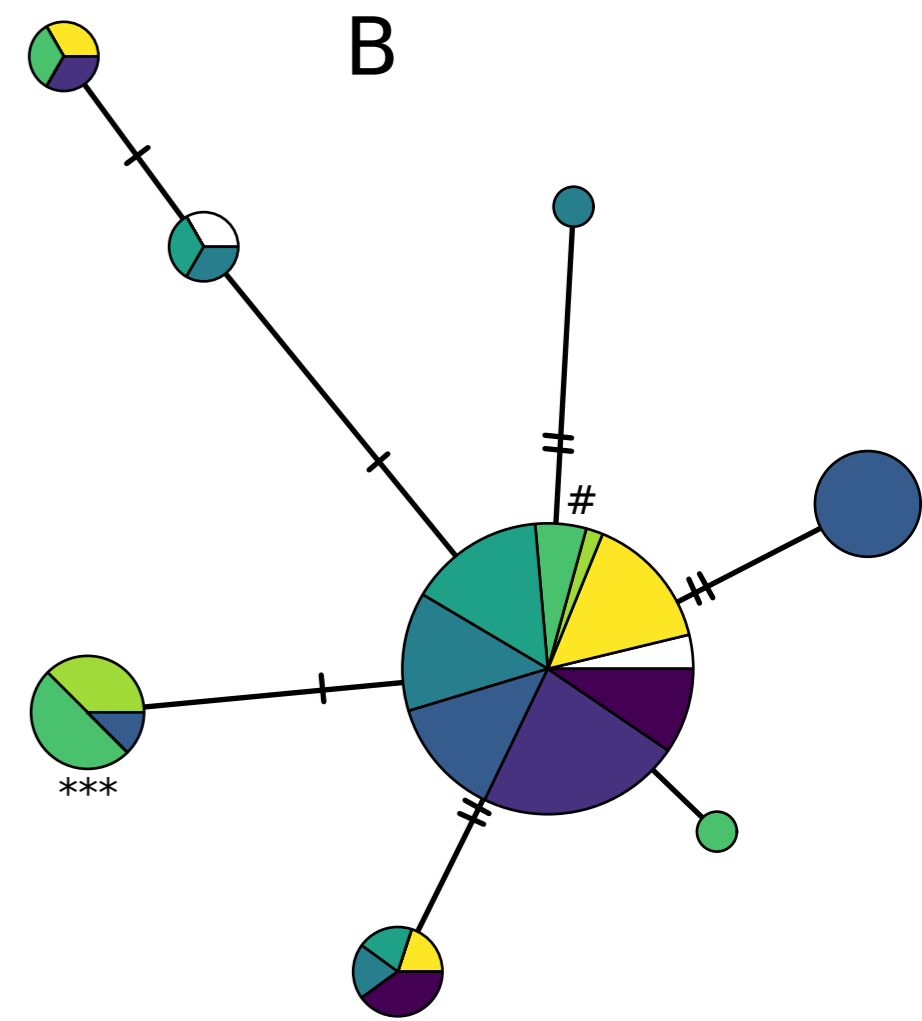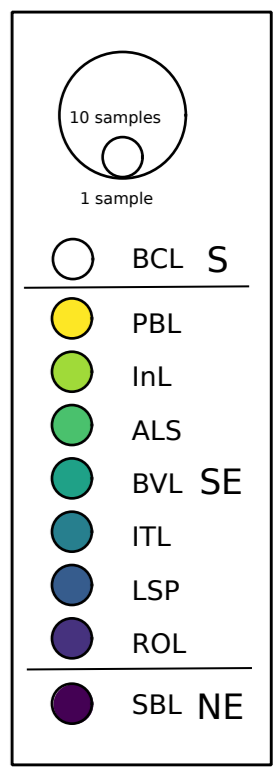

Supplement: Supplementary file 2 [file c6a04daf8061daf83c1037f6.pdf]

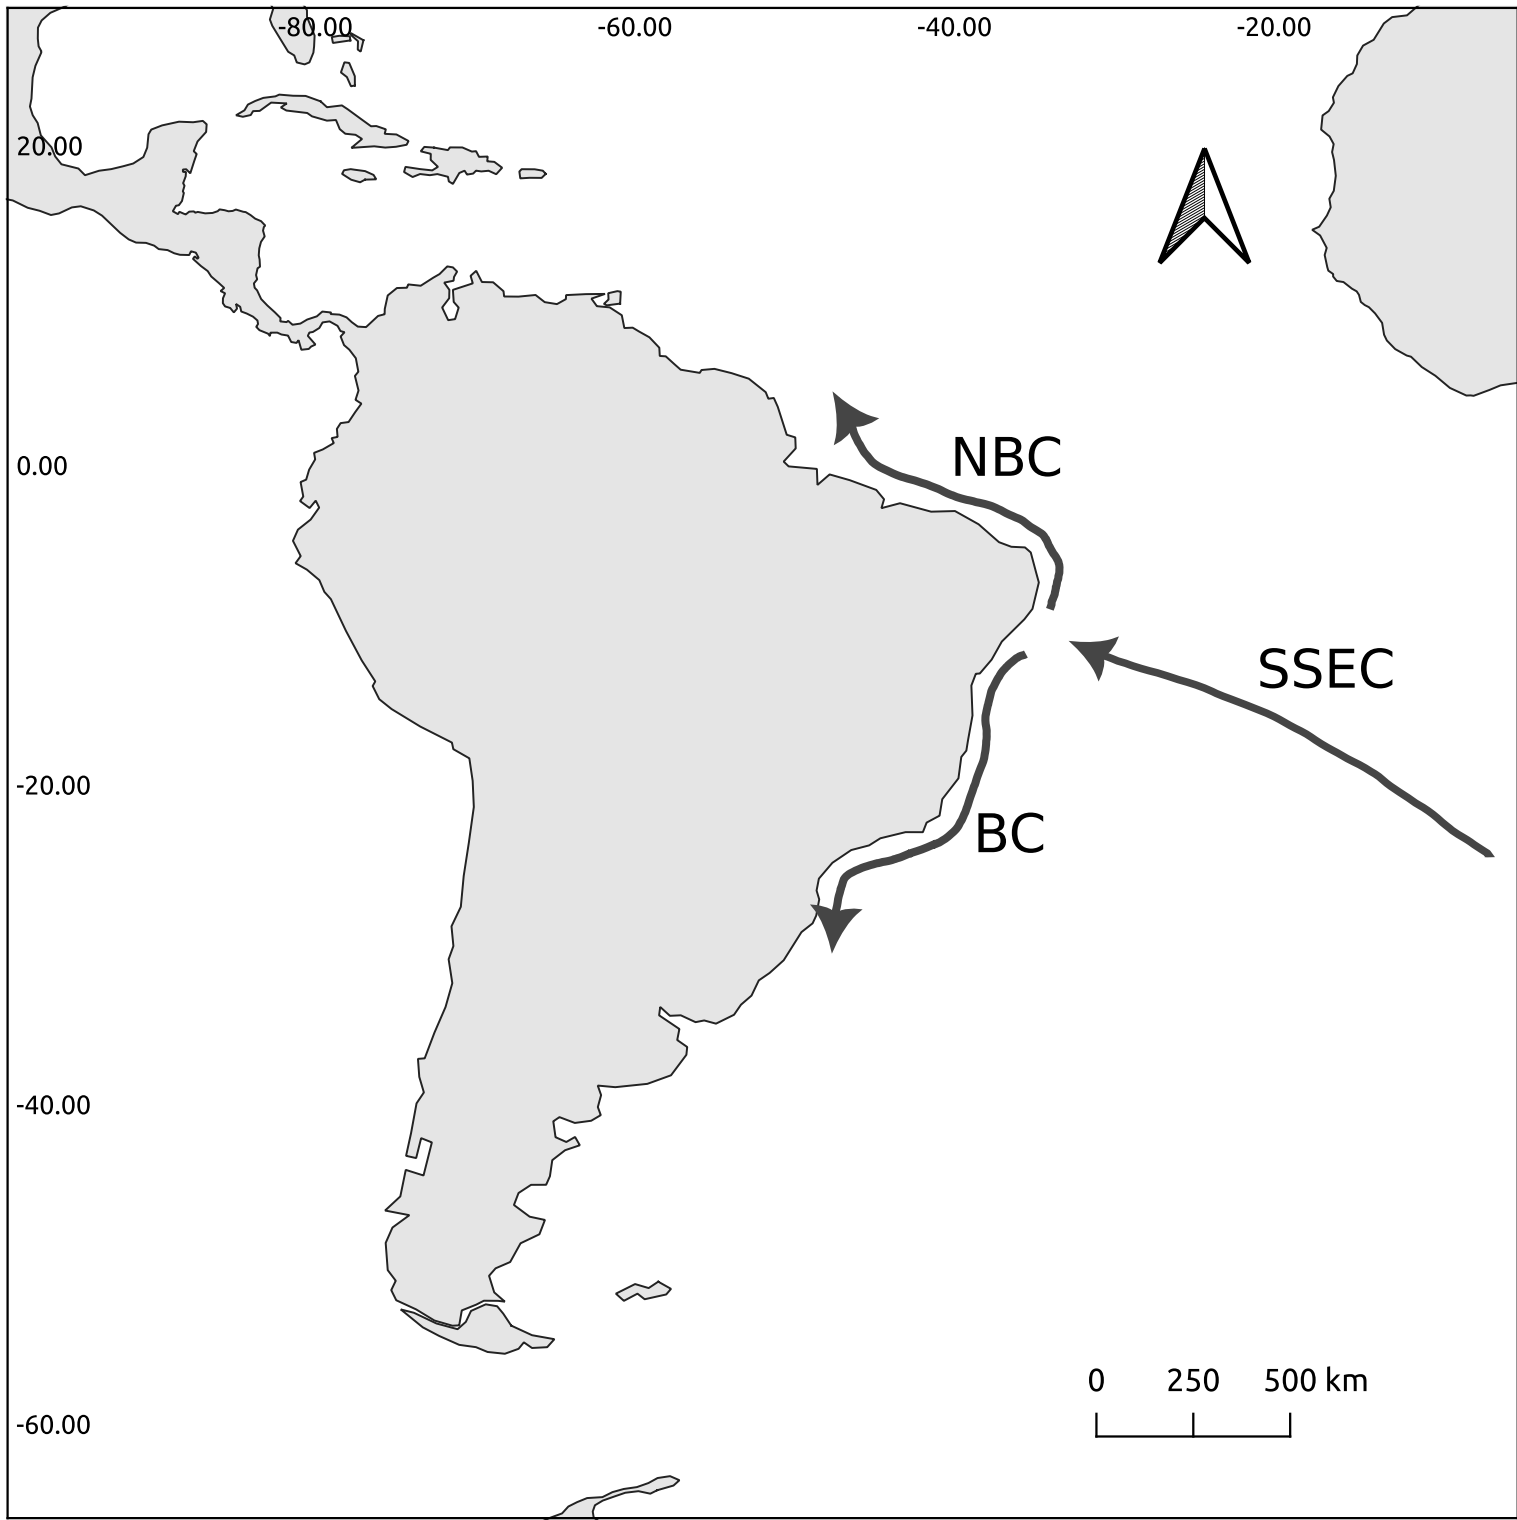

Supplement: Supplementary file 3 [file c82e1042b35f04e9a811fd75.pdf]

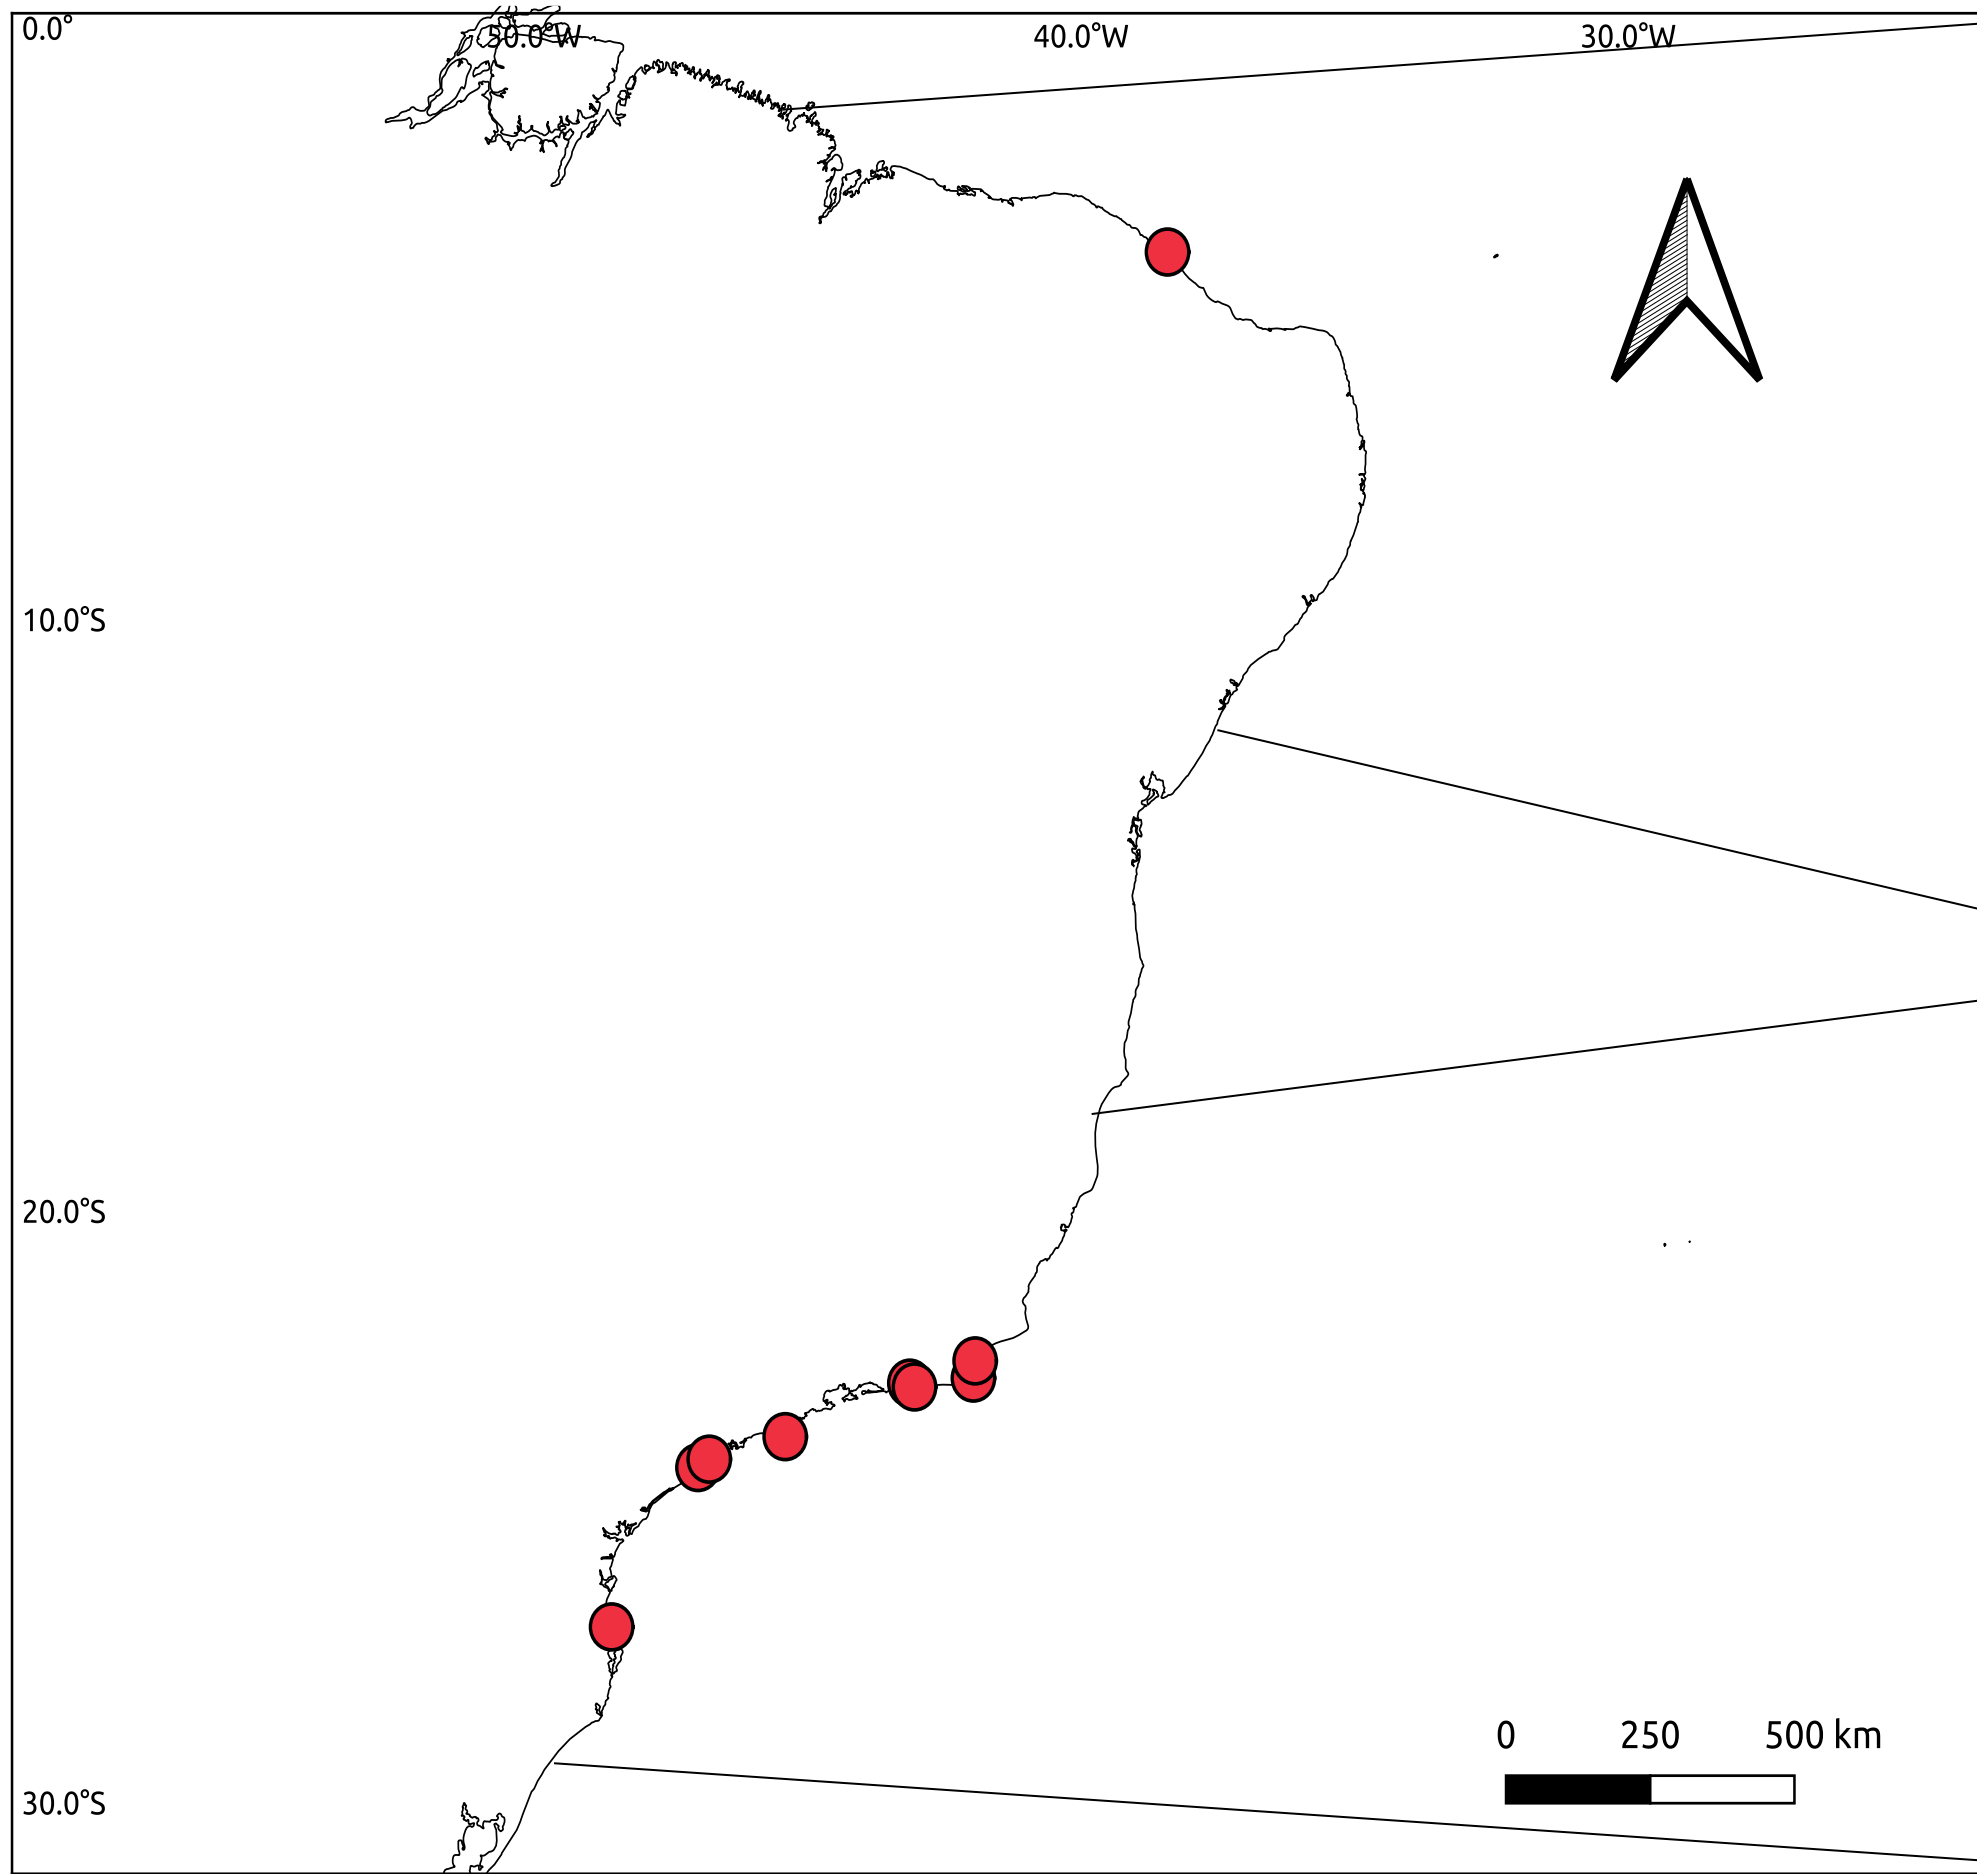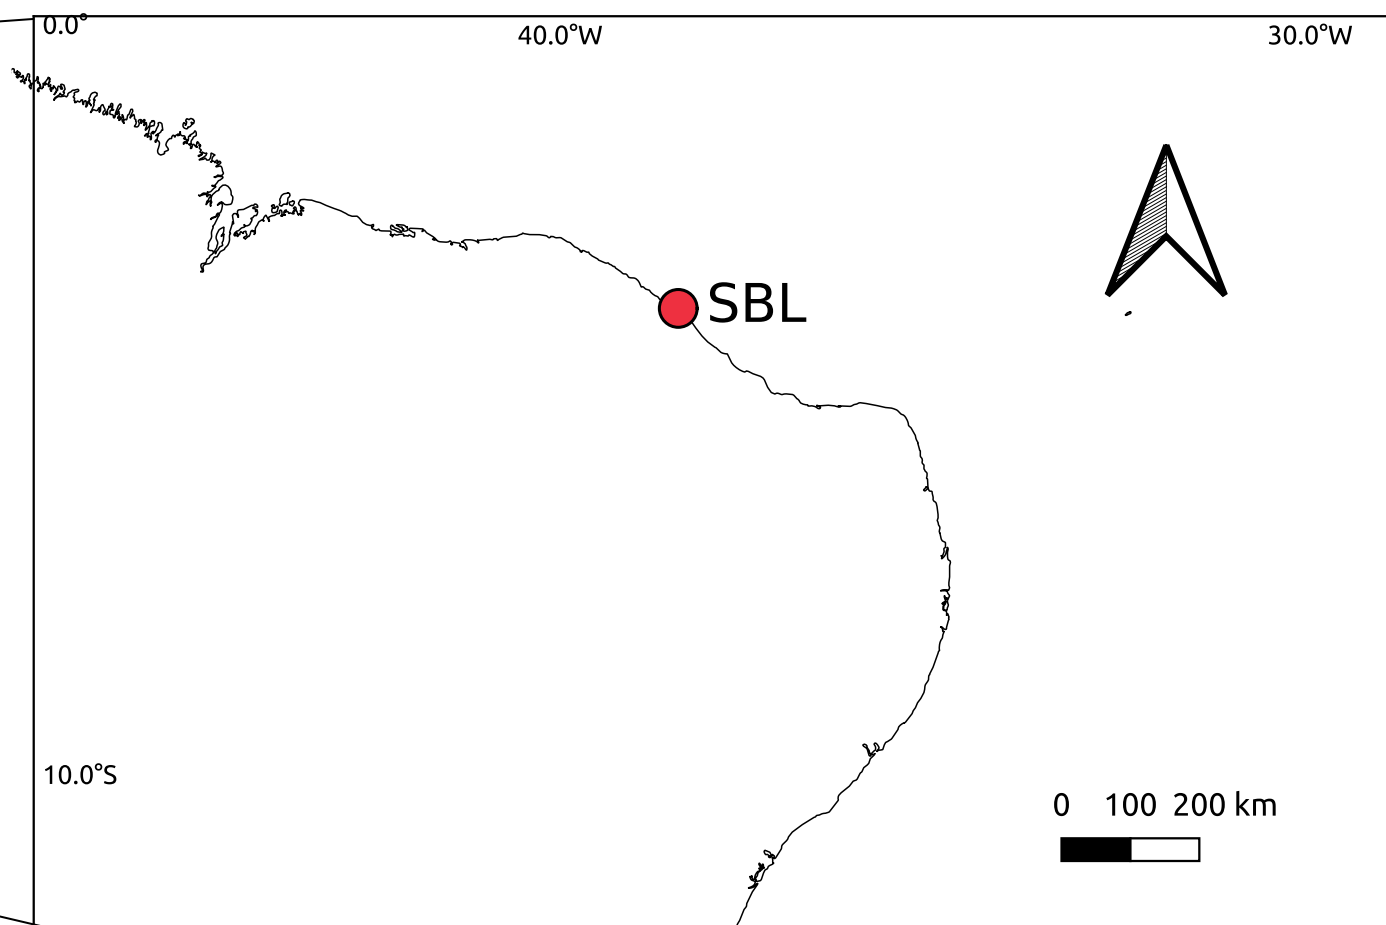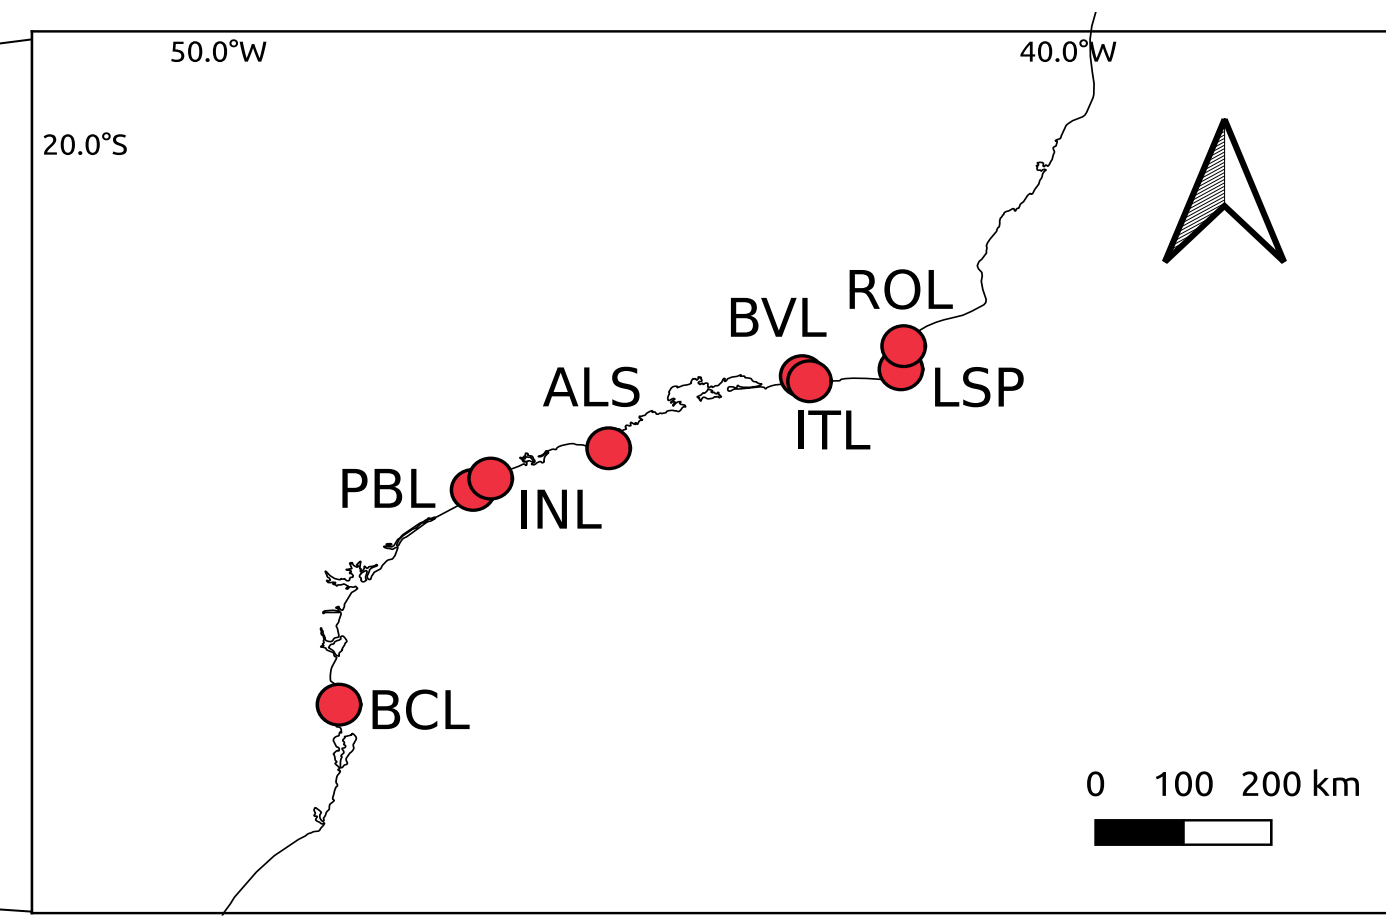

Supplement: Supplementary file 4 [file dd80fe901a132bf63962fa0c.pdf]
